# Supplementary material for: Microbubble synthesis of hybridised bacterial cellulose–gelatin separators for multifunctional supercapacitors
Source: Royal Society of Chemistry journal article supplement (doi:10.1039/d4se01684j), 2025-01-01
Supplement: d4se01684j1.pdf [file d4se01684j1.pdf]

## Microbubble synthesis of hybridised bacterial cellulose-gelatin separators for multifunctional supercapacitors

Surachai Chaichana,<sup>a</sup> Pawin lamprasertkun,<sup>b,c</sup> Montree Sawangphruk,<sup>d</sup> Noelia Rubio<sup>e</sup> and Pichamon Sirisinudomkit<sup>\*a,f,g</sup>

- a) Department of Mining and Materials Engineering, Faculty of Engineering, Prince of Songkla University, Hat Yai, Songkhla, 90110, Thailand
- b) School of Bio-Chemical Engineering and Technology, Sirindhorn International Institute of Technology, Thammasat University, Pathum Thani, 12120, Thailand
- c) Research Unit in Sustainable Electrochemical Intelligent, Thammasat University, Pathum Thani, 12120, Thailand
- d) Centre of Excellence for Energy Storage Technology, Department of Chemical and Biomolecular Engineering, School of Energy Science and Engineering, Vidyasirimedhi Institute of Science and Technology, Rayong, 21210, Thailand
- e) Department of Organic and Inorganic Chemistry, Faculty of Pharmacy, University of Alcalá, Madrid, 28805, Spain
- f) Research Center in Materials Innovation for Carbon Neutrality (MATICN), Prince of Songkla University, Hat Yai, Songkhla, 90110, Thailand
- g) PSU EV development Center, Faculty Engineering, Prince of Songkla University, Hatyai, Songkhla, 90110, Thailand

\*Corresponding author E-mail address: pichamon.si@psu.ac.th

### 1. Calculation

#### Specific surface area

The specific surface area estimated via the adsorption of methylene blue ( $S_{MB}$ )

$$S_{MB} = \frac{N_g \times a_{MB} \times N \times 10^{-20}}{MW_{MB}} \quad (S1)$$

Where  $N$  is Avogadro's number ( $6.02 \times 10^{23} \text{ mol}^{-1}$ ),  $a_{MB}$  is the surface area which one molecule of methylene blue is occupied,  $N_g$  is the number of methylene blue molecules which are adsorbed, and  $MW_{MB}$  is the molecular weight of methylene blue (319.85 g/mol).

#### The crystallinity

$$CI = \frac{A_c}{A_t} \times 100\% \quad (S2)$$

Where  $A_t$  is the total area of the diffraction including crystalline and amorphous diffraction and  $A_c$  is the area of the crystalline diffraction.

### The tensile test

Stress ( $\sigma_t$ ) is calculated at the maximum applied force ( $F_{max}$ ) where the sample is broken normalised by the cross-sectional area of sample ( $A_{CSA}$ ) through Equation S3. The strain ( $\epsilon$ ) is calculated from the change in length of the sample from the original length to the failure length ( $\Delta x$ ) dependent on gauge length ( $L$ ) which is used.

$$\sigma_t = \frac{F_{max}}{A_{CSA}} \quad (S3)$$

$$\epsilon = \frac{\Delta x}{L} \quad (S4)$$

Young modulus of elasticity ( $E$ ) is obtained through the proportional of average stress by average strain of samples (S5).

$$E_t = \frac{\sigma}{\epsilon} \quad (S5)$$

### The specific capacitance of the as-fabricated symmetric supercapacitors

Gravimetric capacitance ( $C_{CV}$ ) of the symmetric devices, which is determined via the Cyclic voltammetry (CV) technique, is calculated by the equation below.

$$C_{cv} = \frac{4 \int idv}{\Delta V_{cv} \times m \times v} \quad (S6)$$

Where  $v$  is the scan rate,  $\Delta V_{cv}$  is a voltage window (V),  $\int idv$  is an integral under CV discharge curve, and  $m$  is the mass of electrode active materials.

Gravimetric capacitance ( $C_{GCD}$ ) of the symmetric devices, which is investigated via the galvanostatic charge discharge (GCD) technique using S7 equation to calculate.

$$C_{GCD} = \frac{4i_{GCD}}{\left(\frac{dV}{dt}\right)} \quad (S7)$$

where  $i_{GCD}$  is the applied current density (A/g), which is the applied current normalised by the mass of electrode active materials.  $\frac{dV}{dt}$  is calculated from the slope obtained by fitting the discharge curve.

### Gravimetric energy and power density of as-fabricated symmetric supercapacitors

Gravimetric energy density ( $E_{cell}$ ) and gravimetric power density ( $P_{cell}$ ) were calculated by S8 and S9 equations respectively.

$$E_{cell} = i \int V dt \quad (S8)$$

$$P_{cell} = \frac{E_{cell}}{t_{discharge}} \quad (S9)$$

Where  $t_{discharge}$  is the discharging time,  $i$  is the applied current density (A/g) and  $\int Vdt$  is the area under discharge curve.

### The Coulombic efficiency

Coulombic efficiency ( $\eta$ ) is amount of discharging time divided by amount of charging time at the same applied current density:

$$\eta = \left( \frac{t_{discharge}}{t_{charge}} \right) \times 100\% \quad (S10)$$

Where  $t_{charge}$  is charging time and  $t_{discharge}$  is the discharging time.

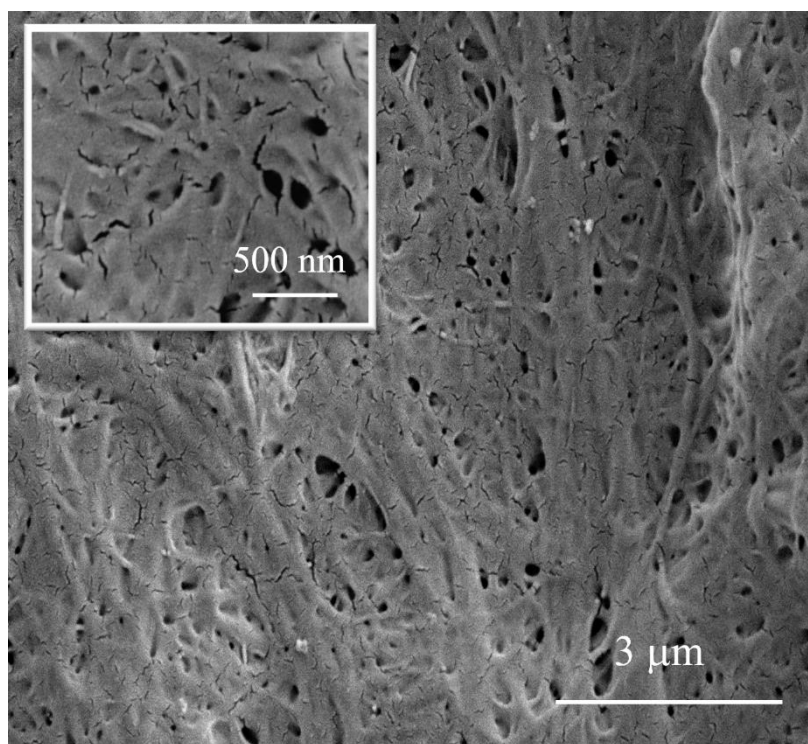

**Fig. S1** FE-SEM images of 2BC2GT\_R200

**Table S1.** The specific surface areas determined by methylene blue adsorption ( $S_{MB}$ ) using equation S1 and the amount of methylene blue molecules which are adsorbed to as-synthesised BC and hybridised BC-gelatin separators ( $N_g$ ).

| Sample        | $N_g$ $10^{-3}$ kg/kg | $S_{MB}$ $10^{-3}$ km <sup>2</sup> /kg |
|---------------|-----------------------|----------------------------------------|
| 2BC           | 0.00473               | 17.58                                  |
| 2BC1.5GT      | 0.00483               | 17.95                                  |
| 2BC_R200      | 0.00508               | 18.87                                  |
| 2BC1.5GT_R200 | 0.00539               | 20.03                                  |

**Table S2.** Thickness of as-synthesised BC and hybridised BC-gelatin separators.

| Sample        | Thickness ( $\mu\text{m}$ ) |
|---------------|-----------------------------|
| 2BC           | 15.3 $\pm$ 0.9              |
| 2BC1.5GT      | 22.6 $\pm$ 2.7              |
| 2BC_R200      | 16.4 $\pm$ 2.8              |
| 2BC1.5GT_R200 | 38.8 $\pm$ 3.1              |

**Table S3.** Contact angle information.

| Sample        | Drop | contact angle $\theta$ [ $^\circ$ ] |       |                          | SD  | %RSD |
|---------------|------|-------------------------------------|-------|--------------------------|-----|------|
|               |      | left                                | right | average (left and right) |     |      |
| 2BC           | 1    | 83.8                                | 78.7  | 79.7                     | 3.4 | 4.3  |
|               | 2    | 75.7                                | 76.0  |                          |     |      |
|               | 3    | 80.9                                | 82.9  |                          |     |      |
| 2BC1.5GT      | 1    | 72.7                                | 70.4  | 71.6                     | 0.8 | 1.2  |
|               | 2    | 71.9                                | 72.0  |                          |     |      |
|               | 3    | 70.9                                | 71.3  |                          |     |      |
| 2BC_R200      | 1    | 52.8                                | 51.6  | 53.1                     | 1.0 | 2.0  |
|               | 2    | 53.2                                | 54.8  |                          |     |      |
|               | 3    | 53.4                                | 52.8  |                          |     |      |
| 2BC1.5GT_R200 | 1    | 27.7                                | 26.9  | 27.5                     | 0.3 | 1.1  |
|               | 2    | 27.6                                | 27.6  |                          |     |      |
|               | 3    | 27.5                                | 27.5  |                          |     |      |

## Mechanical performance

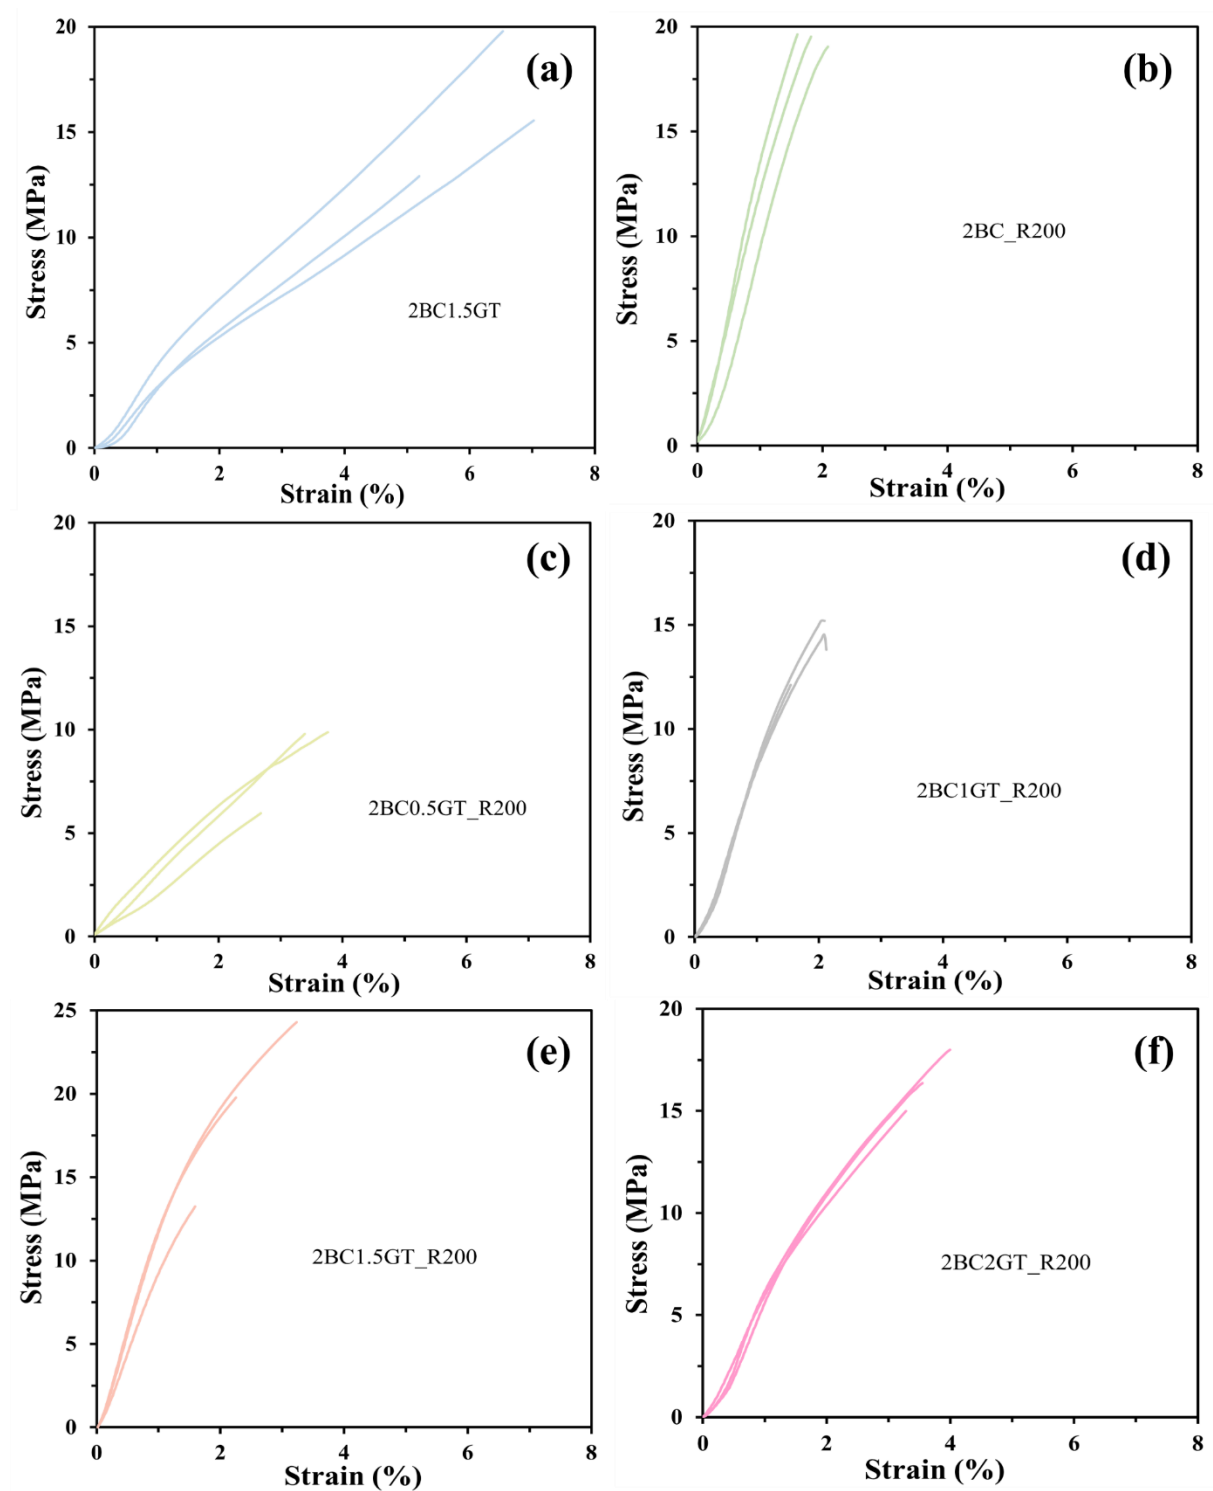

**Fig. S2** Stress–strain curves of (a) 2B1.5GT, (b) 2BC\_R200, (c) 2BC0.5GT\_R200, (d) 2BC1GT\_R200, (e) 2BC1.5GT\_R200 and (f) 2BC2GT\_R200.

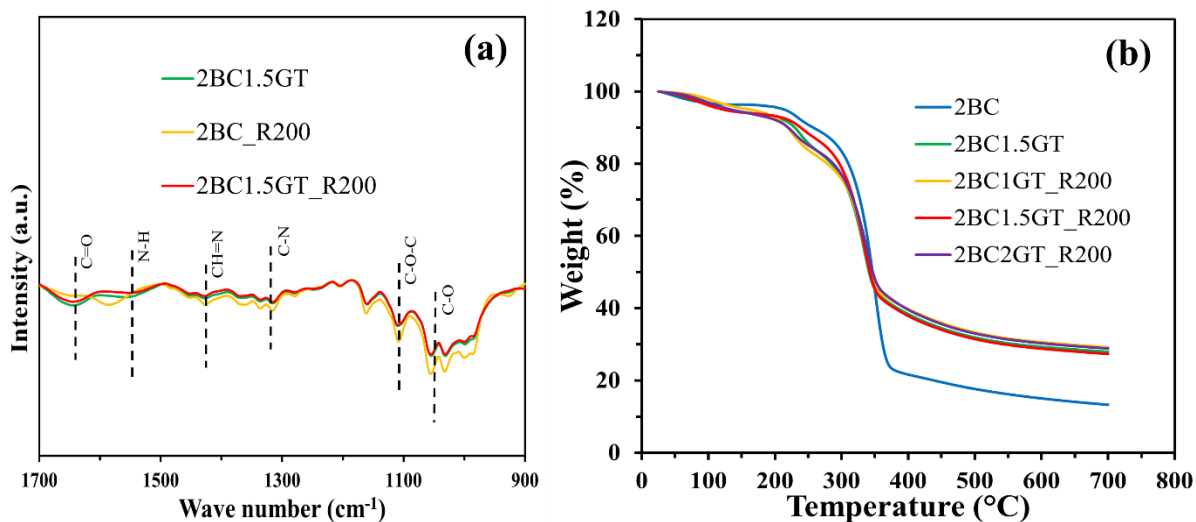

**Fig. S3** (a) FTIR spectrum of 2BC1.5GT, 2BC\_R200 and 2BC1.5GT\_R200 and (b) TGA (N<sub>2</sub>) curves of as-synthesised BC and hybridised BC-gelatin separators.

#### The electrochemical characteristic of hybridised BC-gelatin separators via EIS

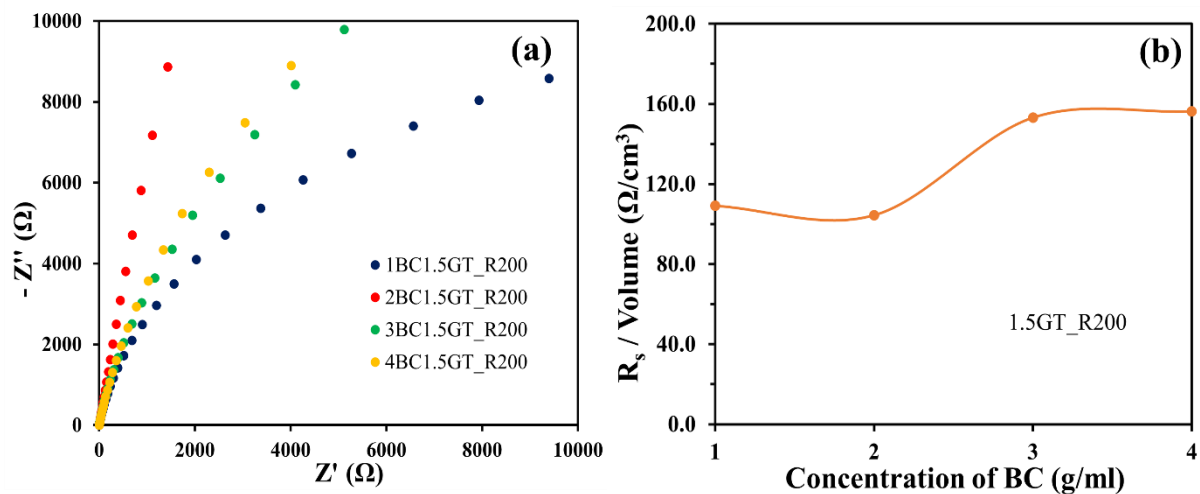

**Fig S4.** (a) Nyquist plots and (b) R<sub>s</sub>/volume of of as-prepared BC and hybridised BC-gelatin separators at different concentration of BC.
